# Supplementary material
Source: PubMed Central journal article supplement (PMC3557595)
Supplement: NIHMS424747-supplement-01.pdf [file NIHMS424747-supplement-01.pdf]

**Supplementary Information**

**Identification of Functionally Conserved Regions in the Structure of the  
Chaperone/CenH3/H4 Complex**

Jingjun Hong, Hanqiao Feng, Zheng Zhou, Rodolfo Ghirlando, Yawen Bai

## Materials and methods

### Gene cloning, expression, and purification of histones and chaperones

The cloning, expression and purification of His6-KK-Cse4<sup>Sc</sup><sub>151-229</sub>, H4<sup>Sc</sup><sub>1-103</sub>, and Scm3<sup>Sc</sup><sub>84-169</sub> were described in our earlier work (11).

### Reconstitution of protein complexes

The heterotrimeric complex Scm3<sup>Sc</sup><sub>84-169</sub>/His6-KK-Cse4<sup>Sc</sup><sub>151-229</sub>/H4<sup>Sc</sup><sub>1-103</sub> in 50 mM MES (pH 5.6) was prepared as described in our earlier work (11). To make the complex containing His6-KK-Cse4<sup>Sc</sup><sub>151-229</sub> and H4<sup>Sc</sup><sub>1-103</sub>, lyophilized proteins were denatured in 6 M GuDCl and dialyzed overnight against 10 mM Tris-HCl, 500 mM NaCl (pH 7.4) at 4°C. After purification by gel filtration under the same conditions, the sample was exchanged to different buffers: 50 mM MES (pH 5.6), 50 mM MES (pH 5.6) and 150 mM NaCl, 50 mM phosphate (pH 6.5) and 150 mM NaCl, 50 mM phosphate (pH 7.4) and 150 mM NaCl, respectively.

### Analytical ultracentrifugation experiments

The sample containing GS-HJURP<sup>Hs</sup><sub>2-81</sub>, GS-CENP-A<sup>Hs</sup><sub>60-140</sub>-LVPR and H4<sup>Hs</sup><sub>1-103</sub> was studied in 50 mM MES (pH 5.6), 5 mM  $\beta$ ME at a loading concentration of 0.68 A<sub>280</sub> (31.5  $\mu$ M), whereas the sample containing GS-HJURP<sup>Hs</sup><sub>2-81</sub>, GS-CENP-A<sup>Hs</sup><sub>60-140</sub>-LVPR and GS-H4<sup>Hs</sup><sub>22-103</sub> was studied in 150 mM NaCl, 50 mM phosphate (pH 7.0), 5 mM  $\beta$ ME at a loading concentration of 1.00 A<sub>280</sub> (46.5  $\mu$ M). Moreover, the sample containing GS-CENP-A<sup>Hs</sup><sub>60-140</sub>-LVPR and GS-H4<sup>Hs</sup><sub>22-103</sub> was studied in 50 mM MES (pH 5.6) and 5 mM  $\beta$ ME and in 50 mM NaAc (pH 4.5) and 5 mM  $\beta$ ME at a dimer concentration of 77  $\mu$ M. Samples containing His6-

KK-Cse4<sup>Sc</sup><sub>151-229</sub> and H4<sup>Sc</sup><sub>1-103</sub> were studied at a dimer concentration of 46  $\mu$ M in different buffers: 50 mM MES (pH 5.6); 50 mM MES (pH 5.6) and 150 mM NaCl; 50 mM phosphate (pH 6.5) and 150 mM NaCl; 50 mM phosphate (pH 7.4) and 150 mM NaCl.

Sedimentation velocity experiments were conducted at 20.0°C on a Beckman Optima XL-A or Beckman Coulter ProteomeLab XL-I analytical ultracentrifuge. 400  $\mu$ l of each of the samples were loaded in 2-channel centerpiece cells and analyzed at a rotor speed of 50 krpm with scans collected at approximately 7.5 minute intervals. Data were collected using the absorbance optical system in continuous mode at 280 nm using radial step size of 0.003 cm. Data were also collected using the Rayleigh interference detection system when possible. All data were analyzed in SEDFIT 12.7 (28) in terms of a continuous  $c(s)$  distribution of Lamm equation solutions covering a maximal  $s_{20,w}$  range of 0 - 10 with a resolution of 20 points per S and a confidence level of 0.68. Excellent fits were obtained with RMSD values ranging from 0.0031 – 0.0054 absorbance units. Solution densities  $\rho$  and viscosities  $\eta$  were measured as described (11), or calculated in SEDNTERP 1.09 (29). Sedimentation coefficients  $s$  were corrected to  $s_{20,w}$ .

### **NMR experiments**

NMR experiments were performed on Bruker 500 and 700 MHz spectrometers at 25°C (human HJURP/CENP-A/H4, Sc Scm3/Cse4/H4, Kl Cse4/H4). The following experiments were recorded: [<sup>1</sup>H, <sup>15</sup>N]-HSQC, 3D CBCANH,

CBCA(CO)NH, HNCO, HN(CA)CO, HNCA, HN(CO)CA; TROSY version: [ $^1\text{H}$ ,  
 $^{15}\text{N}$ ]-TROSY, 3D HNCACB, HN(CO)CACB, HNCA, HN(CO)CA, HNCO,  
HN(CA)CO.

**Table S1. A list of constructs used in this study**

- 
1. His6-Cse4<sup>KI</sup><sub>106-183</sub>-LVPRGS-H4<sup>KI</sup><sub>30-103</sub>
  2. His6-Cse4<sup>KI</sup><sub>106-183</sub> (L158G/L159G/L161G/H162G)-LVPRGS-H4<sup>KI</sup><sub>30-103</sub>
  3. H3<sup>KI</sup><sub>61-136</sub>
  4. H3<sup>KI</sup><sub>61-136</sub> (S88M/G91M/S96A/V97S)
  5. H4<sup>KI</sup><sub>1-103</sub>
  6. His6-SSGLVPRGS-Scm3<sup>KI</sup><sub>43-143</sub>
  7. His6-KK-Cse4<sup>Sc</sup><sub>151-207</sub>-LVPRGS-H4<sup>Sc</sup><sub>45-103</sub>
  8. His6-KK-Cse4<sup>Sc</sup><sub>151-229</sub>
  9. H4<sup>Sc</sup><sub>1-103</sub>
  10. Scm3<sup>Sc</sup><sub>84-169</sub>
  11. His6-SSGLVPRGS-CENP-A<sup>Hs</sup><sub>60-140</sub>-LVPRGS-HJURP<sup>Hs</sup><sub>2-81</sub>
  12. H3.1<sup>Hs</sup><sub>1-136</sub>-His6
  13. H3.1<sup>Hs</sup><sub>1-136</sub> (S88Q/G103H)-His6
  14. H4<sup>Hs</sup><sub>1-103</sub>
  15. H4<sup>Hs</sup><sub>1-15</sub>-LVPRGS-H4<sup>Hs</sup><sub>22-103</sub>
-

**Table S2. Protein samples used in this work**

---

**NMR samples**

1. GS-Scm3<sup>KI</sup><sub>43-143</sub> / His6-Cse4<sup>KI</sup><sub>106-183</sub>-LVPR / GS-H4<sup>KI</sup><sub>30-103</sub>
2. His6-KK-Cse4<sup>Sc</sup><sub>151-207</sub>-LVPRGS-H4<sup>Sc</sup><sub>45-103</sub>
3. His6-KK-Cse4<sup>Sc</sup><sub>151-207</sub>-LVPR / GS-H4<sup>Sc</sup><sub>45-103</sub>
4. Scm3<sup>Sc</sup><sub>84-169</sub> / His6-KK-Cse4<sup>Sc</sup><sub>151-229</sub> / H4<sup>Sc</sup><sub>1-103</sub>
5. GS-HJURP<sup>Hs</sup><sub>2-81</sub> / GS-CENP-A<sup>Hs</sup><sub>60-140</sub>-LVPR / H4<sup>Hs</sup><sub>1-103</sub>
6. GS-HJURP<sup>Hs</sup><sub>2-81</sub> / GS-CENP-A<sup>Hs</sup><sub>60-140</sub>-LVPR / GS-H4<sup>Hs</sup><sub>22-103</sub>
7. (GS-CENP-A<sup>Hs</sup><sub>60-140</sub>-LVPR / GS-H4<sup>Hs</sup><sub>22-103</sub>)<sub>2</sub>

**Sedimentation velocity samples**

1. GS-Scm3<sup>KI</sup><sub>43-143</sub> / His6-Cse4<sup>KI</sup><sub>106-183</sub> (L158G/L159G/L161G/H162G)-LVPR / GS-H4<sup>KI</sup><sub>30-103</sub>
  2. His6-Cse4<sup>KI</sup><sub>106-183</sub>-LVPR / GS-H4<sup>KI</sup><sub>30-103</sub>
  3. His6-KK-Cse4<sup>Sc</sup><sub>151-229</sub> / H4<sup>Sc</sup><sub>1-103</sub>
  4. GS-HJURP<sup>Hs</sup><sub>2-81</sub> / GS-CENP-A<sup>Hs</sup><sub>60-140</sub>-LVPR / H4<sup>Hs</sup><sub>1-103</sub>
  5. GS-HJURP<sup>Hs</sup><sub>2-81</sub> / GS-CENP-A<sup>Hs</sup><sub>60-140</sub>-LVPR / GS-H4<sup>Hs</sup><sub>22-103</sub>
  6. GS-CENP-A<sup>Hs</sup><sub>60-140</sub>-LVPR / GS-H4<sup>Hs</sup><sub>22-103</sub>
- 

The proteins described in the text are shown in blue.

**Table S3. Parameters for the folded regions (Cse4<sub>157-197</sub> and H4<sub>51-94</sub>) in the single-chain model (pdb ID: 2LY8).**

---

**NMR distance and dihedral constraints**

|                                          |      |
|------------------------------------------|------|
| Total NOE                                | 3382 |
| Intra residues NOE                       | 912  |
| Sequential NOE ( $ i-j  = 1$ )           | 853  |
| Medium range NOE ( $ i-j  < 5$ )         | 1151 |
| Long range NOE ( $ i-j  > 4$ )           | 466  |
| H-bonds                                  | 118  |
| Dihedral angles ( $\Phi, \Psi$ ) (TALOS) | 190  |

**Structure statistics**

|                                                   |                    |
|---------------------------------------------------|--------------------|
| Violations (mean $\pm$ s.d.)                      |                    |
| Distance constraints ( $\text{\AA}$ )             | 0.065 $\pm$ 0.003  |
| Dihedral constraints ( $\text{\AA}$ )             | 0.441 $\pm$ 0.02   |
| Deviation from idealized geometry                 |                    |
| Bonds ( $\text{\AA}$ )                            | 0.005 $\pm$ 0.0001 |
| Angles ( $^\circ$ )                               | 0.650 $\pm$ 0.025  |
| Impropers ( $^\circ$ )                            | 0.463 $\pm$ 0.030  |
| Average pairwise r.m.s deviation ( $\text{\AA}$ ) |                    |
| Backbone atoms                                    | 0.20               |
| All heavy atoms                                   | 0.78               |

**Procheck statistics**

|                            |       |
|----------------------------|-------|
| Residues in                |       |
| most favored regions       | 85.6% |
| additional allowed regions | 11.4% |
| generously allowed regions | 2.2%  |
| disallowed regions         | 0.8%  |

---

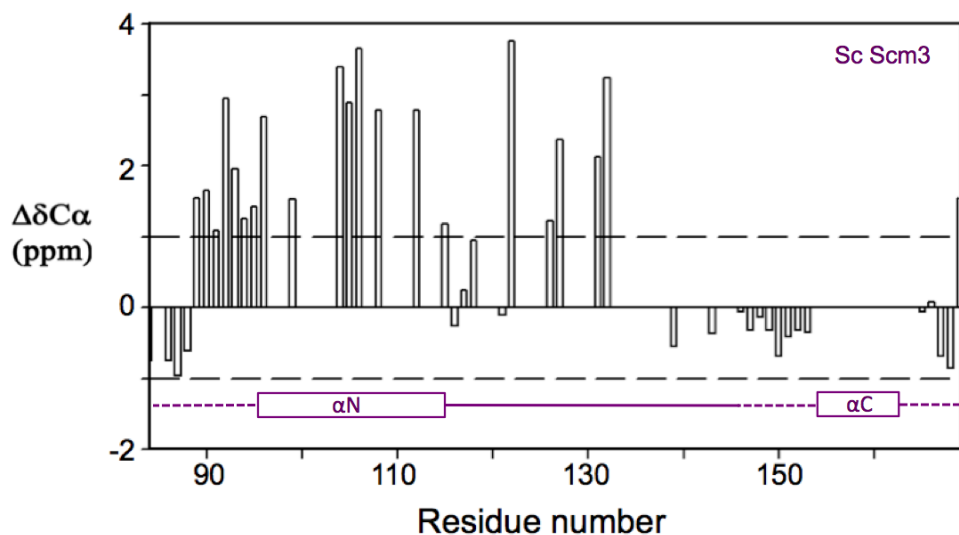

**Fig. S1.** Scm3 forms a longer helix at lower temperature. Deviations of the C $\alpha$  chemical shifts of the Sc Scm3 from random coil values in the three-chain Scm3/Cse4/H4 complex at 25°C. The structured regions of Scm3 in the NMR structure of the single-chain Sc Scm3/Cse4/H4 complex are shown in solid lines and the unstructured regions are shown in dashed lines.



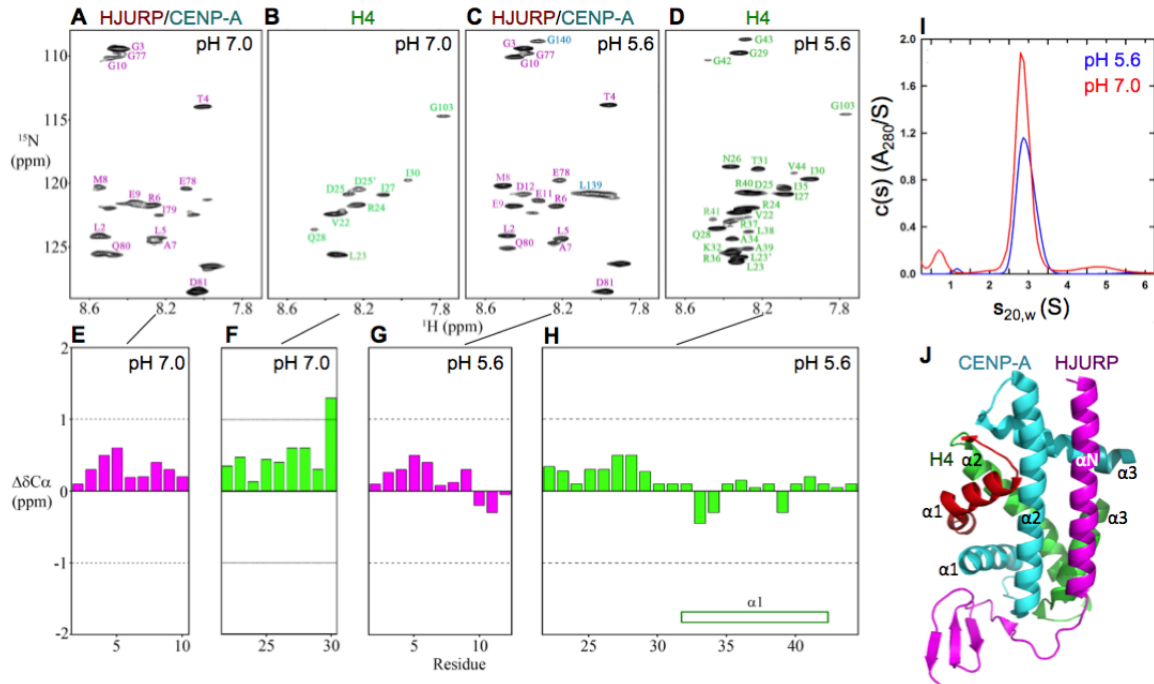

**Fig. S2.** pH-dependent structure of the HJURP/CENP-A/H4 complex as revealed by NMR. (A, B)  $^1\text{H}$ - $^{15}\text{N}$  HSQC spectra of  $^{15}\text{N}/^{13}\text{C}$ -labeled HJURP/CENP-A in complex with non-labeled H4 (A) and  $^{15}\text{N}/^{13}\text{C}$ -labeled H4 in complex with non-labeled HJURP/CENP-A (B) at pH 7.0. (C, D)  $^1\text{H}$ - $^{15}\text{N}$  HSQC spectra of  $^{15}\text{N}/^{13}\text{C}$ -labeled HJURP/CENP-A in complex with non-labeled H4 (C) and  $^{15}\text{N}/^{13}\text{C}$ -labeled H4 in complex with non-labeled HJURP/CENP-A (D) at pH 5.6. (E, F) Deviations of the  $\text{C}\alpha$  Chemical shifts of the N-terminal regions of HJURP (E) and H4 (F) from random coil values at pH 7.0. (G, H) Deviations of the  $\text{C}\alpha$  Chemical shifts of the N-terminal region of HJURP (G) and the  $\alpha 1$  helix of H4 (H) from random coil values at pH 5.6. (I) Analytical ultracentrifugation on the HJURP/CENP-A/H4 complex at pH 5.6 and 7.0 revealing the presence of a major species at 2.85 S with a molar mass ranging from 29 kDa (pH 7.0) to 33 kDa (pH 5.6) indicative of a heterotrimer. (J) Mapping of the unfolded  $\alpha 1$  helix (red) on the crystal structure of the HJURP/CENP-A/H4 complex. (Note that at pH 7.0, the *Kl Scm3/Cse4/H4* does not produce workable NMR spectra).

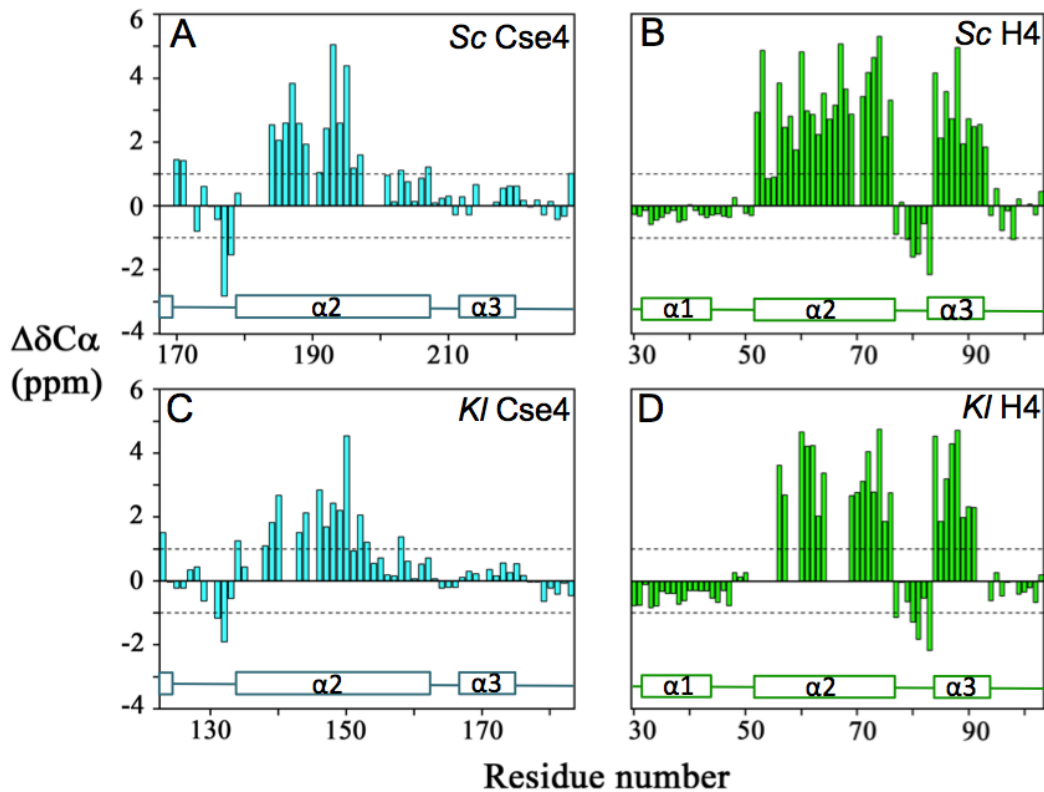

**Fig. S3.** The C-terminal region of the  $\alpha 2$  helix and the  $\alpha 3$  helix of Cse4 and the  $\alpha 1$  helix of H4 are unstructured in the Cse4/H4 dimer. Deviations of the  $C_{\alpha}$  chemical shifts of the Cse4/H4 dimer from random coil values. (A) Sc Cse4 (11). (B) Sc H4 (11). (C) Kl Cse4. (D) Kl H4. The  $\alpha 1$  helix region of Kl Cse4 was not assigned.

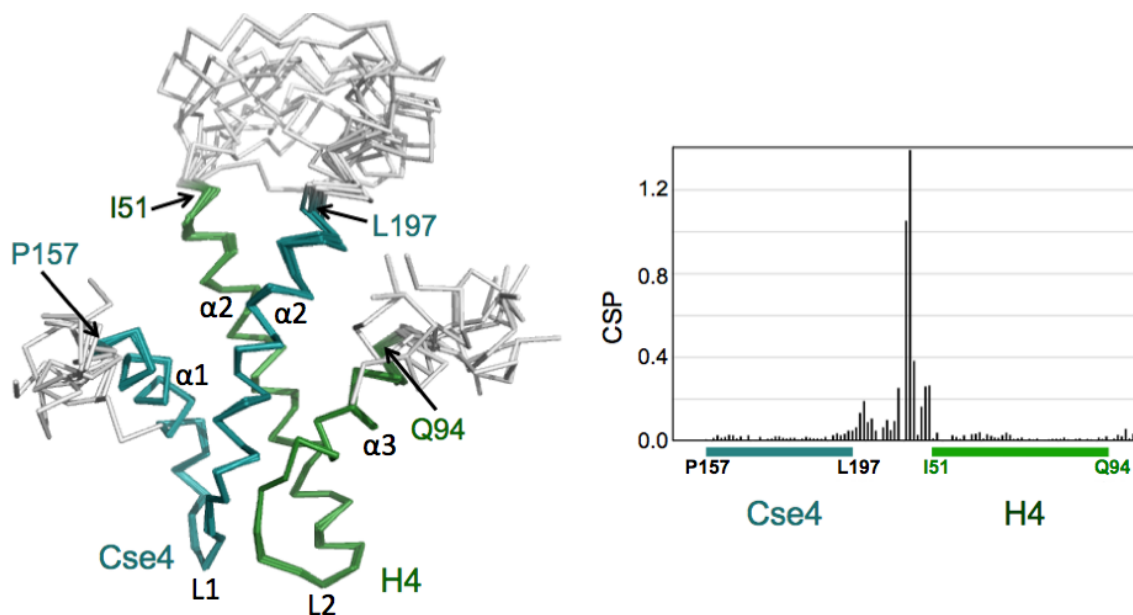

**Fig. S4.** Structure of the single-chain Sc Cse4/H4. (A) Overlay of the 10 calculated structures with the lowest energy on the folded core (P157-L197 of Cse4 and I51-Q94 of H4). (B) The chemical shift perturbation (CSP) between the single-chain model and two-chain complex that is obtained by cutting the linker with thrombin protease. CSP is calculated with  $\{(\Delta\delta^1\text{H})^2 + (\Delta\delta^{15}\text{N}/5)^2\}^{1/2}$  for each residue. There are only small chemical shift changes in the folded region of the Cse4/H4 dimer, indicating that the single-chain model does not perturb the folded core of the Cse4/H4 dimer. Note that there are 15 unfolded residues linking the  $\alpha 2$  helices of Cse4 and H4.

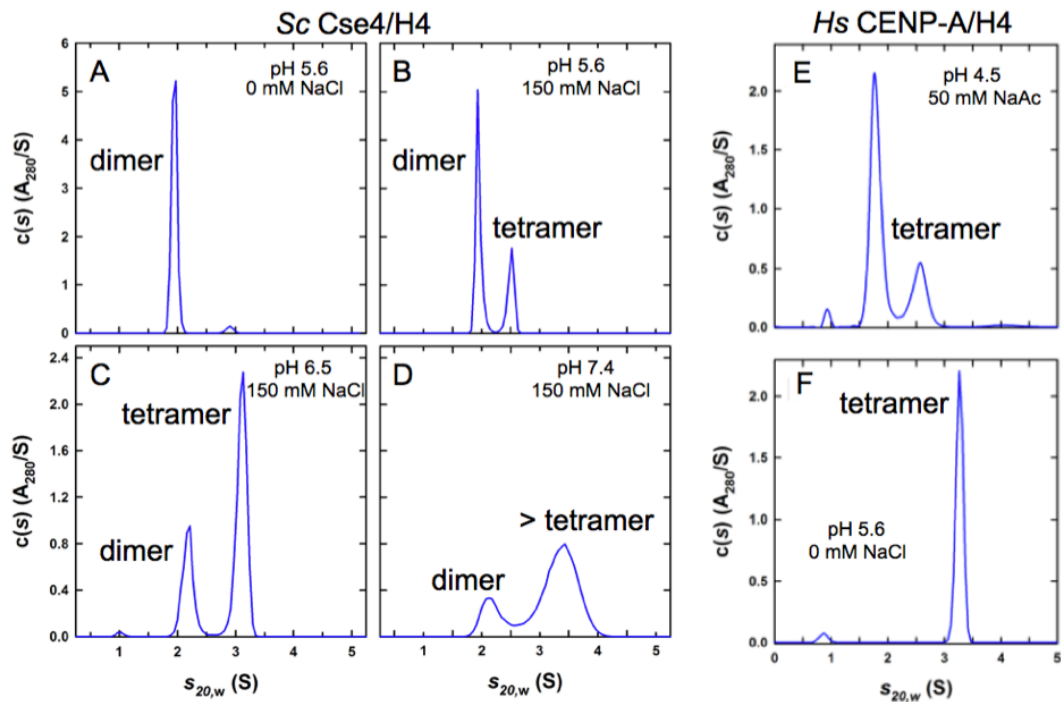

**Fig. S5.** pH- and salt-dependent equilibria of the CenH3/H4 dimer and the (CenH3/H4)<sub>2</sub> tetramer. (A-D) *Sc* Cse4/H4 dimer and (Cse4/H4)<sub>2</sub> tetramer. (E-F) Human CENP-A/H4 dimer and (CENP-A/H4)<sub>2</sub> tetramer.
